# Supplementary material for: Measuring and upscaling micromechanical interactions in a cohesive granular material
Source: Royal Society of Chemistry journal article supplement (doi:10.1039/d1sm00458a), 2021-01-01
Supplement: d1sm00458a1.pdf [file d1sm00458a1.pdf]

## Electronic Supplementary Information for: Measuring and upscaling micromechanical interactions in a cohesive granular material

Arnaud Hemmerle,<sup>1,2</sup> Yuta Yamaguchi,<sup>3,4</sup> Marcin Makowski,<sup>1</sup> Oliver Bäumchen,<sup>1,5</sup> and Lucas Goehring<sup>6</sup>

<sup>1</sup>Max Planck Institute for Dynamics and Self-Organization - Am Fassberg 17, 37077 Göttingen, Germany.

<sup>2</sup>Synchrotron SOLEIL, L'Orme des Merisiers, Saint-Aubin, BP 48, 91192 Gif-sur-Yvette Cedex, France.

<sup>3</sup>Department of Earth and Planetary Science, University of Tokyo - 7-3-1 Hongo, Bunkyo, 113-0033 Tokyo, Japan.

<sup>4</sup>Department of Earth and Space Science, Osaka University - 1-1 Machikaneyamacho, Toyonaka, 560-0043 Osaka, Japan.

<sup>5</sup>Experimental Physics V, University of Bayreuth, Universitätsstr. 30, D-95447 Bayreuth, Germany.

<sup>6</sup>School of Science and Technology, Nottingham Trent University - Clifton Lane, Nottingham NG11 8NS, UK.

### I. SUPPLEMENTAL MOVIE CAPTIONS

#### Movie S1 (*S1\_tension\_test.avi*)

Movie of a micromechanical test in the normal configuration, with normal spring constant  $k_n = 425$  N/m, deformation speed of  $1 \mu\text{m/s}$ , bead diameters  $D_1 = 374 \mu\text{m}$  and  $D_2 = 392 \mu\text{m}$ , and bridge diameter  $d = 105 \mu\text{m}$ .

#### Movie S2 (*S2\_shear\_test.avi*)

Movie of a micromechanical test in the tangential configuration, with tangential spring constant  $k_t = 16$  N/m, deformation speed of  $1 \mu\text{m/s}$ , bead diameters  $D_1 = 396 \mu\text{m}$  and  $D_2 = 364 \mu\text{m}$ , and bridge diameter  $d = 75 \mu\text{m}$ .

#### Movie S3 (*S3\_sample\_A\_particles\_movie.avi*)

Movie illustrating the particle detection for the X-ray microtomogram of Sample A. The movie pans through cross-sectional views of the sample. The detected particles have been replaced by black spheres, of diameter  $200.9 \mu\text{m}$ , to demonstrate the fidelity of the image processing. A list of the detected particle positions is given in the accompanying file *S1\_sample\_A\_particles\_positions.txt*.

#### Movie S4 (*S4\_sample\_B\_particles\_movie.avi*)

Movie illustrating the particle detection for the X-ray microtomogram of Sample B. A list of the detected particle positions is given in the accompanying file *S2\_sample\_B\_particles\_positions.txt*.

#### Movie S5 (*S5\_sample\_A\_simulation.mp4*)

Movie showing example DEM simulation of uniaxial compression test with particle positions taken from sample A. The bead colour indicates,  $\delta_z$ , the relative displacement along the axis of compression,  $z$ , of each particle relative to its position at zero strain, normalised by the particles diameter. This visualisation is consistent with that reported in the matching experiments, in Ref. [1].

#### Movie S6 (*S6\_sample\_B\_simulation.mp4*)

Movie showing example DEM simulation of uniaxial compression test with particle positions taken from sample B.

### II. SUPPLEMENTAL TABLE CAPTIONS

#### Table S1 (*S1\_sample\_A\_particles\_positions.txt*)

Position of the centre of each particle detected in the X-ray microtomogram of sample A (voxel size =  $4.875 \mu\text{m}$ ).  
Columns 1 and 2 :  $x, y$  coordinates (in pixels, relative to the  $(x, y)$  centre of the stack).  
Column 3 :  $z$  coordinate (in pixels, relative to the top of the stack).

#### Table S2 (*S2\_sample\_B\_particles\_positions.txt*)

Position of the centre of each particle detected in the X-ray microtomogram of sample B (voxel size =  $4.493 \mu\text{m}$ ).  
Columns 1 and 2 :  $x, y$  coordinates (in pixels, relative to the  $(x, y)$  centre of the stack).  
Column 3 :  $z$  coordinate (in pixels, relative to the top of the stack).

---

[1] A. Hemmerle, M. Schröter and L. Goehring, *Sci. Rep.*, 2016, **6**, 35650.
